# Supplementary material for: The Life-Cycle Costs of School Water, Sanitation and Hygiene Access in Kenyan Primary Schools
Source: MDPI journal article supplement (doi:10.3390/ijerph13070637), 2016-06-27
Supplement: s1 [file s1]

# Supplementary Materials: The Life-Cycle Costs of School Water, Sanitation and Hygiene Access in Kenyan Primary Schools

Kelly T. Alexander, Alex Mwaki, Dorothy Adhiambo, Malaika Cheney-Coker, Richard Muga and Matthew C. Freeman

**Table S1.** Basic standards for school WASH [1,2].

| Item                                 | Description                                                                                                                       |
|--------------------------------------|-----------------------------------------------------------------------------------------------------------------------------------|
| Sufficient latrines                  | The Government of Kenya states that the ideal student:latrine ratio is 25:1 for girls and 30:1 for boys, with a urinal available. |
| Separate latrines for boys and girls | Boys and girls do not share the same facilities.                                                                                  |
| Privacy in latrines                  | Locks on latrine doors; latrines without large holes in walls or doors.                                                           |
| Clean latrines                       | Latrines should be clean enough (including non-offensive smell) so that students feel comfortable using them.                     |
| Handwashing water with soap          | Handwashing water and soap provided to students every day and all day.                                                            |
| Clean, safe drinking water           | Water that is treated or filtered and available to students every day and all day.                                                |
| Hygiene education                    | All students taught about handwashing, and principles around latrine use and safe water. Students educated on menstruation.       |
| Sanitary pads                        | Sanitary pads available for menstruating girls in case of emergency.                                                              |
| Anal-cleansing                       | Toilet paper or extra water containers and cups, or other anal-cleansing needs according to cultural practices.                   |

## References

1. Mooijman, A. *Water, Sanitation and Hygiene (WASH) in Schools*; UNICEF: New York, NY, USA, 2012.
2. WHO. *Water, Sanitation and Hygiene Standards in Low-Cost Settings*; Adams, J., Bartram J., Chartier, Y., Sims, J., Eds.; WHO Press, World Health Organization: Geneva, Switzerland, 2009.

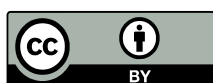

© 2016 by the authors; licensee MDPI, Basel, Switzerland. This article is an open access article distributed under the terms and conditions of the Creative Commons by Attribution (CC-BY) license (<http://creativecommons.org/licenses/by/4.0/>).
