# Supplementary material for: The Life-Cycle Costs of School Water, Sanitation and Hygiene Access in Kenyan Primary Schools
Source: Int J Environ Res Public Health. 2016 Jun 27;13(7):637. doi: 10.3390/ijerph13070637 (PMC4962178; doi:10.3390/ijerph13070637)
Supplement: Supplementary file 2 [file ijerph-13-00637-s002.xlsx]

## Sheet: S2. School WASH budget
Table S2. Kenya School WASH Budget Worksheet 2014
All calculations done for schools of 400 students
The capital costs are estimated from a combination of NGO and government reported costs
Ten-year capital	Unit cost	Frequency	Total cost	Frequency	Comments
Borehole	850000	KES/once	850000	KES/school/10yrs	A school of 400 students would need at least 1200L of water per day for drinking and handwashing according to Sphere guidelines (3L per student per day).
10,000L tank	120000	KES/once	240000	KES/school/10yrs
25,000L tank	300000	KES/once	600000	KES/school/10yrs
Gutters	18000	KES/once	18000	KES/school/10yrs	Approximate cost of initial installation of gutters
VIP latrine: four doors	200000	KES	800000	KES/school/10yrs	Four sets of four door VIP latrine. 16 doors for a school of 400.
Total capital costs			1658000	KES/per school/10yrs	Note: Total covers RWH system with gutters and tanks
			4145	KES/student/10yrs	Total divided by 400 students
			414.5	KES/student/yr	Total divided by 10 years
Costs are based on the average reported costs from NGOs and from 89 schools across 3 regions of Kenya
Three-year capital					Comments
Hygiene
Containers for handwashing	4000	KES	20000	KES/school/3yrs	Four 250L containers per school
Containers for drinking water	900	KES	8000	KES/school/3yrs	Four 60L containers per school
Containers for MHM	900	KES	1000	KES/school/3yrs	One 60L container per school
Total tri-annual costs			29000	KES/school/3yrs
			72.5	KES/student/3yrs	Total divided by 400 students
			24.1667	KES/student/yr	Total divided by 3 years
Costs are based on the average reported costs from six NGOs working in Kenya
WASH training costs	Unit cost	Frequency	Total cost	Frequency	Comments
Training
Teacher training costs	3500	KES/person	7000	KES/school/yr	Training conducted at conference facility (2 teachers for 3 days)
Training material costs	200	KES/person	400	KES/school/yr	Cost of training materials for two teachers
SMC training costs (total)	15000	KES/school	15000	KES/school/yr	Training conducted onsite at schools (13 people for 3 days)
Artisan training costs (total)	1200	KES/person	4800	KES/school/yr	Training conducted onsite at schools (4 people for 1 day)
Project implementation team	7500	KES/person	2500	KES/sub-county/yr	Training conducted at conference facility (20 people for 3 days); Adjusted for school to cover 1/3 a person to attend meeting
Total training costs			29700	KES/school/yr
			74.25	KES/student/yr	Total divided by 400 students
Costs are based on the average reported costs from 89 schools across 3 regions of Kenya
Yearly maintenance (400 students)	Unit cost		Total cost	Frequency	Comments
Major Repairs
General repairs to water hardware			10	KES/school/yr	Average cost for repairs to water systems
General repairs to sanitation hardware			12	KES/school/yr	Average cost for drainage or structural repairs
General repairs to hygiene hardware			7	KES/school/yr	Average cost for replacement of stands or fixing handwashing stations
Maintenance of source	5000	KES	12.5	KES/school/yr	Regular maintenance on water system
Latrine pit emptying	3400	KES per latrine pit	8.5	KES/school/yr	Emptying of one latrine pit per year
Cleaning of storage tanks	4000	KES	10	KES/school/yr	Periodic cleaning of water tanks
Minor repairs
Taps, pipes or gutters	4000	KES	10	KES/school/yr	Gutters may need re-alignment, new taps or pipes
Replacement of latrine doors	500	KES per door	3.5	KES/school/yr	Replacing 3 new latrine doors per year; 500KES per door
Latrine door hinges			3	KES/school/yr	Replacing half the total door hinges each year
Latrine door locks/latches			4	KES/school/yr	Replacing half the total locks/latches each year
Pipe, cap or screen repair (VIP)			3	KES/school/yr	Replacing one vent cap and one vent pipe per year (VIP latrines)
Buckets and brooms			4.5	KES/school/yr	One bucket and one commercial broom per 4 latrine pits
Tap repair			2	KES/school/yr	Replacing 1-2 taps per year
Total yearly recurrent costs			90	KES/student/yr
Costs are based on the average reported costs from 90 schools across 3 regions of Kenya
Monthly recurrent (400 students)	Unit cost	Frequency	Total cost	Frequency	Comments
WATER
Water treatment	1	KES/student/mo.	9	KES/student/yr	Average costs spent on water treatment
Security guard	5	KES/student/mo.	45	KES/student/yr	Average cost per security guard: 4000; PTA pays half of salary
SANITATION/HYGIENE
Detergent	1.5	KES/student/mo.	13.5	KES/student/yr	Average costs spent on detergent for cleaning latrines
Disinfectant	1.5	KES/student/mo.	13.5	KES/student/yr	Average costs spent on disinfectant for cleaning latrines
Soap for handwashing	1.5	KES/student/mo.	13.5	KES/student/yr	Average costs spent on soap for handwashing; likely insufficient, as very few schools purchased soap
Sanitary pads	1.5	KES/student/mo.	13.5	KES/student/yr	School data: GoK gives 1 pad to each menstruating girl per month, for "emergency use." Here we calculated 3 pads per girl per month; for 25% (50) of girls at a school of 400 students, 4KES per pad.
Toilet tissue	8	KES/student/m	72	KES/student/yr	Half roll per student per month
					Comments
Total monthly recurrent costs			180	KES/student/yr	Monthly costs for school WASH program
Total annual maintenance and monthly recurrent costs			270	KES/student/yr	Total FPE allocation per student needed to cover yearly maintenance costs and monthly recurrent costs. Security guard costs shared 50% with PTA.
